# Supplementary material for: The sea cucumber genome provides insights into morphological evolution and visceral regeneration
Source: PLoS Biol. 2017 Oct 12;15(10):e2003790. doi: 10.1371/journal.pbio.2003790 (PMC5638244; doi:10.1371/journal.pbio.2003790)
Supplement: S4 Table — (XLSX) [file pbio.2003790.s025.xlsx]

## Sheet: Sheet1
S4 Table. Assembly statistics of published marine invertebrate genomes.
Species	Genome size	Contig N50	Scaffold N50	Gene number	Published Year
Ciona intestinalis	160 Mb	20 Kb	190 Kb	16000	2002
Strongylocentrotus purpuratus	814 Mb	18.5 Kb	65.6 Kb	23300	2006
Nematostella vectensis	470 Mb	19.8 Kb	47.8 Kb	18000	2007
Hydra magnipapillata	1.05 Gb	12.8 Kb	63.4 Kb	20000	2010
Ectocarpussiliculosus	214 Mb	32 Kb	504 Kb	16256	2010
Acropora digitifera	420 Mb	10 Kb	191.5 Kb	23688	2011
Capitella teleta	324 Mb	21.9 Kb	0.19 Mb	32389	2012
Crassostrea gigas	559 Mb	19.4 Kb	401 Kb	28000	2012
Lottia gigantea	348 Mb	96 Kb	1.87 Mb	23800	2012
Mnemiopsis leidyi	150 Mb	11.9 Kb	187 Kb	16548	2013
Hippocampus comes	695 Mb	34.7 Kb	1.8 Mb	23458	2016
Paralichthys olivaceus	546 Mb	30.5 Kb	3.9 Mb	21787	2016
Patinopecten yessoensis	988 Mb	38 Kb	804 Kb	26415	2017
Acanthaster planci	383 Mb	54.9 Kb	916 Kb	20328	2017
Bathymodiolus platifrons	1.64 Gb	13.2 Kb	343.4 Kb	33584	2017
Apostichopus japonicus	880Gb	190.3Kb	486.7Kb	30350	Present study
