# Supplementary material for: The sea cucumber genome provides insights into morphological evolution and visceral regeneration
Source: PLoS Biol. 2017 Oct 12;15(10):e2003790. doi: 10.1371/journal.pbio.2003790 (PMC5638244; doi:10.1371/journal.pbio.2003790)
Supplement: S5 Table — (XLSX) [file pbio.2003790.s026.xlsx]

## Sheet: Sheet1
S5 Table. Summary of the final genome assembly.
	Number		Length (bp)
	Contig	Scaffold	Contig	Scaffold
Total length	--	--	799342275	804993085
Max length	--	--	1074537	2494933
Total number	7058	3281	--	--
Length >= 2 Kb	6915	3233	--	--
N50 length	1242	515	190269	486650
N60 length	1714	700	151361	390464
N70 length	2313	942	118164	289258
N80 length	3086	1275	90076	201782
N90 length	4119	1779	66391	121462
