# Supplementary material for: The sea cucumber genome provides insights into morphological evolution and visceral regeneration
Source: PLoS Biol. 2017 Oct 12;15(10):e2003790. doi: 10.1371/journal.pbio.2003790 (PMC5638244; doi:10.1371/journal.pbio.2003790)
Supplement: S7 Table — (XLSX) [file pbio.2003790.s028.xlsx]

## Sheet: Sheet1
S7 Table. Gene region coverage assessed by core eukaryotic genes in CEGMA.
	#Prots	%Completeness	#Total	Average	%Ortho
Complete	220	88.71	388	1.76	46.82
Group1	55	88.33	80	1.45	25.45
Group2	48	85.71	81	1.69	50
Group3	54	88.52	101	1.87	51.85
Group4	66	96.92	126	2	58.73
Partial	242	97.58	470	1.94	53.31
Group1	63	95.45	100	1.59	36.51
Group2	55	98.21	101	1.84	54.55
Group3	59	96.72	124	2.1	57.63
Group4	65	100	145	2.23	64.62
