# Supplementary material for: The sea cucumber genome provides insights into morphological evolution and visceral regeneration
Source: PLoS Biol. 2017 Oct 12;15(10):e2003790. doi: 10.1371/journal.pbio.2003790 (PMC5638244; doi:10.1371/journal.pbio.2003790)
Supplement: S15 Table — Acar, Anolis carolinensis; Cpic, Chrysemys picta; Hsap, Homo sapiens; Xtro, Xenopus tropicalis; Drer, Danio rerio; Bflo, Branchiostoma floridae; Skow, Saccoglossus kowalevskii; Spur, Strongylocentrotus purpuratus; Ajap, A. japonicus; Dpul, Daphnia pulex; Hrob, Helobdella robusta; Cgig, Crassostrea gigas; Obim, Octopus bimaculoides; Nvec, Nematostella vectensis; Tadh, Trichoplax adhaerens; and Aque, Amphimedon queenslandica. (XLSX) [file pbio.2003790.s036.xlsx]

## Sheet: Sheet1
S15 Table. Top 8 significantly expanded gene families in A. japonicus. Acar, Anolis carolinensis; Cpic, Chrysemys picta; Hsap, Homo sapiens; Xtro, Xenopus tropicalis; Drer, Danio rerio; Bflo, Branchiostoma floridae; Skow, Saccoglossus kowalevskii; Spur, Strongylocentrotus purpuratus; Ajap, A. japonicus; Dpul, Daphnia pulex; Hrob, Helobdella robusta; Cgig, Crassostrea gigas; Obim, Octopus bimaculo…
Gene family	Acar	Cpic	Hsap	Xtro	Drer	Bflo	Skow	Spur	Ajap	Dpul	Hrob	Cgig	Obim	Nvec	Tadh	Aque
FREPs	37	36	101	89	87	126	67	41	564	42	72	228	15	147	18	271
NLR family CARD domain-containing protein	0	0	0	0	0	39	7	47	620	0	0	0	4	4	0	0
NACHT, LRR and PYD domains-containing protein 10	0	0	0	0	0	19	1	14	349	0	0	0	0	0	0	0
Zinc finger CCHC domain-containing protein	7	6	3	48	73	4	25	32	507	25	3	60	4	6	1	5
Tyrosine-protein kinase receptor	8	13	8	7	11	20	16	77	372	0	1	3	4	0	0	1
Netrin receptor UNC5B	8	9	6	10	8	9	7	4	234	2	1	7	6	2	0	0
Retrovirus-related Pol polyprotein from transposon	3	4	0	7	10	0	11	11	362	0	0	12	0	0	0	2
Glycoprotein 3-alpha-L-fucosyltransferase A	10	6	12	17	19	23	0	32	96	83	4	19	6	15	14	2
