# Supplementary material for: The sea cucumber genome provides insights into morphological evolution and visceral regeneration
Source: PLoS Biol. 2017 Oct 12;15(10):e2003790. doi: 10.1371/journal.pbio.2003790 (PMC5638244; doi:10.1371/journal.pbio.2003790)
Supplement: S20 Table — The up-regulated folds between 0–3 days post evisceration (dpe) are shown. (XLSX) [file pbio.2003790.s041.xlsx]

## Sheet: Sheet1
S20 Table. Detail of seven PSP94-like proteins found in the proteome result. The up-regulated folds between 0-3 dpe is shown.
Protein ID	PSP94-like genes	Up-regulated folds in 0-3 dpe
AJAP05134	PSP scaffold889_18	7.56
AJAP11738	PSP scaffold889_19	6.7
AJAP03576	PSP scaffold889_24	4.57
AJAP20138	PSP scaffold889_26	4.36
AJAP28783	PSP scaffold889_23	4.35
AJAP05982	PSP scaffold889_20	4.27
AJAP26714	PSP scaffold889_28	1.63
