# Supplementary material for: The sea cucumber genome provides insights into morphological evolution and visceral regeneration
Source: PLoS Biol. 2017 Oct 12;15(10):e2003790. doi: 10.1371/journal.pbio.2003790 (PMC5638244; doi:10.1371/journal.pbio.2003790)
Supplement: S21 Table — The fibrinogen-related proteins (FREPs) are shown in red. (XLSX) [file pbio.2003790.s042.xlsx]

## Sheet: Sheet1
S21 Table. Top 10 up-regulated proteins between 7 and 14 days after intestine regeneration in A. japonicus. The fibrinogen-related proteins (FREPs) are shown in red.
Protein ID	Description	Up-regulated fold
AJAP25032	PREDICTED: testis-expressed sequence 2 protein-like	6.85
AJAP21085	PREDICTED: ficolin 1-like	5.587
AJAP25410	PREDICTED: fibrinogen C domain-containing protein 1-like, partial	4.177
AJAP26258	PREDICTED: fibrinogen C domain-containing protein 1-A-like	3.918
AJAP03917	hypothetical protein CAPTEDRAFT_164839	3.647
AJAP12332	PREDICTED: bifunctionaldihydroflavonol 4-reductase/flavanone 4-reductase-like	2.809
AJAP24792	Glutathione S-transferase theta-1	2.618
AJAP27166	solute carrier family 6 (neurotransmitter transporter, creatine), member	2.577
AJAP12628	hypothetical protein BRAFLDRAFT_86425	2.35
AJAP14956	fibrillar collagen alpha 120 and 140 chains	2.273
